# Supplementary material for: The Current State and Needs of North American Movement Disorders Fellowship Programs
Source: Hindawi journal article supplement (doi:10.1155/2013/701426), 2013-01-01
Supplement: f1 [file 701426.f1.pdf]

# Movement disorders fellowship program survey

Dear Movement Disorders Center/Fellowship Program Director,

We are conducting an academic research study that aims to assess the status of movement disorders fellowship programs in North America. All programs listed as an NPF Center of Excellence or Care Center or in the AAN Fellowship Directory have been asked to participate. Even if you do not currently offer a fellowship program, we invite you to respond to the survey.

We are asking for one participant from each institution (either fellowship director OR center director, not both) to respond once. Please feel free to forward this link to the appropriate person in your institution. Email reminders will be sent in 4 weeks and 8 weeks if you have not completed the study and would still like to do so.

This survey takes about 10-15 minutes to complete and is completely voluntary. Responses will remain anonymous unless you choose to identify yourself. Answers to questions marked with an asterisk (\*) are required before moving to the next page. If you have questions or concerns about this study, please contact Ludy Shih, MD at [lshih@bidmc.harvard.edu](mailto:lshih@bidmc.harvard.edu) or 617-667-0519.

Your participation in this study will be part of an important effort to assess the current status and availability of movement disorders fellowship training in North America.

We hope you will complete the survey and add additional comments.

Sincerely,

Ludy Shih

Daniel Tarsy

Michael Okun

# Movement disorders fellowship program survey

**1. What is the name of your institution/fellowship program?**

**\*2. In which state or province are you located?**

**\*3. Check all of the following that apply to your center:**

- Udall Parkinson's Disease Center
- VA PADRECC Center
- NPF Center of Excellence
- APDA Center of Excellence
- APDA Information and Referral Center
- PDF Center of Excellence
- None of the above
- Other (please specify)

**\*4. Have you offered a Parkinson's disease/movement disorders fellowship in the past?**

- Yes
- No

**\*5. Do you currently offer a Parkinson's disease/movement disorders (PDMD) fellowship?**

- Yes
- No

# Movement disorders fellowship program survey

## Reasons for not offering fellowship

**\*6. If you do not currently offer a Parkinson's disease/movement disorders fellowship, which of the following reasons apply (check all that apply):**

- Not enough funds to cover fellow's salary
- Not enough clinical volume for optimal training experience
- Not enough faculty for optimal training experience
- Too much administrative work
- Faculty/clinicians not able to donate time to train fellow
- Training a fellow detracts from the business of clinical care
- Other (please specify)

# Movement disorders fellowship program survey

## Basic program information

**\*7. In which years have you offered a PDMD fellowship? Indicate how many fellows STARTED that year:**

|         | 0                     | 1                     | 2                     | 3                     | 4                     | 5                     | >5                    |
|---------|-----------------------|-----------------------|-----------------------|-----------------------|-----------------------|-----------------------|-----------------------|
| 2011-12 | <input type="radio"/> | <input type="radio"/> | <input type="radio"/> | <input type="radio"/> | <input type="radio"/> | <input type="radio"/> | <input type="radio"/> |
| 2010-11 | <input type="radio"/> | <input type="radio"/> | <input type="radio"/> | <input type="radio"/> | <input type="radio"/> | <input type="radio"/> | <input type="radio"/> |
| 2009-10 | <input type="radio"/> | <input type="radio"/> | <input type="radio"/> | <input type="radio"/> | <input type="radio"/> | <input type="radio"/> | <input type="radio"/> |
| 2008-9  | <input type="radio"/> | <input type="radio"/> | <input type="radio"/> | <input type="radio"/> | <input type="radio"/> | <input type="radio"/> | <input type="radio"/> |
| 2007-8  | <input type="radio"/> | <input type="radio"/> | <input type="radio"/> | <input type="radio"/> | <input type="radio"/> | <input type="radio"/> | <input type="radio"/> |
| 2006-7  | <input type="radio"/> | <input type="radio"/> | <input type="radio"/> | <input type="radio"/> | <input type="radio"/> | <input type="radio"/> | <input type="radio"/> |
| 2005-6  | <input type="radio"/> | <input type="radio"/> | <input type="radio"/> | <input type="radio"/> | <input type="radio"/> | <input type="radio"/> | <input type="radio"/> |
| 2004-5  | <input type="radio"/> | <input type="radio"/> | <input type="radio"/> | <input type="radio"/> | <input type="radio"/> | <input type="radio"/> | <input type="radio"/> |
| 2003-4  | <input type="radio"/> | <input type="radio"/> | <input type="radio"/> | <input type="radio"/> | <input type="radio"/> | <input type="radio"/> | <input type="radio"/> |
| 2002-3  | <input type="radio"/> | <input type="radio"/> | <input type="radio"/> | <input type="radio"/> | <input type="radio"/> | <input type="radio"/> | <input type="radio"/> |
| 2001-2  | <input type="radio"/> | <input type="radio"/> | <input type="radio"/> | <input type="radio"/> | <input type="radio"/> | <input type="radio"/> | <input type="radio"/> |

# Movement disorders fellowship program survey

## content of fellowship program

**8. Do you offer fellowship slots ONLY to domestic medical graduates (i.e. US medical school graduates for US fellowship programs, Canadian medical school graduates for Canadian fellowship programs)?**

- Yes
- No

**9. What percentage (0-100) of your clinical fellowship slots have gone to applicants who are international medical graduates?**

Number

**\*10. What is the typical length of your fellowship program? Choose only one answer.**

- 1 year minimum, no opportunity for 2nd year
- 1 year minimum, 2nd year optional, if institutional funding available
- 1 year minimum, 2nd year optional, if fellow can obtain his/her own external grant funding
- 2 years minimum, funding for both years available
- More than 2 years

**11. Do you offer varying lengths of your fellowship program? Check all that apply.**

- 1 year minimum, no opportunity for 2nd year
- 1 year minimum, 2nd year optional, if institutional funding available
- 1 year minimum, 2nd year optional, if fellow can obtain grant funding
- 2 years minimum, funding for both years available
- More than 2 years

**\*12. How many half-days each week does the first year fellow work in the following areas?**

|                                      | 0                     | <1                    | 1                     | 2                     | 3                     | 4                     | 5                     | 6                     | 7                     | 8                     | 9                     | 10                    |
|--------------------------------------|-----------------------|-----------------------|-----------------------|-----------------------|-----------------------|-----------------------|-----------------------|-----------------------|-----------------------|-----------------------|-----------------------|-----------------------|
| Outpatient movement disorders clinic | <input type="radio"/> | <input type="radio"/> | <input type="radio"/> | <input type="radio"/> | <input type="radio"/> | <input type="radio"/> | <input type="radio"/> | <input type="radio"/> | <input type="radio"/> | <input type="radio"/> | <input type="radio"/> | <input type="radio"/> |
| Inpatient consults                   | <input type="radio"/> | <input type="radio"/> | <input type="radio"/> | <input type="radio"/> | <input type="radio"/> | <input type="radio"/> | <input type="radio"/> | <input type="radio"/> | <input type="radio"/> | <input type="radio"/> | <input type="radio"/> | <input type="radio"/> |
| Clinical research                    | <input type="radio"/> | <input type="radio"/> | <input type="radio"/> | <input type="radio"/> | <input type="radio"/> | <input type="radio"/> | <input type="radio"/> | <input type="radio"/> | <input type="radio"/> | <input type="radio"/> | <input type="radio"/> | <input type="radio"/> |
| Basic research                       | <input type="radio"/> | <input type="radio"/> | <input type="radio"/> | <input type="radio"/> | <input type="radio"/> | <input type="radio"/> | <input type="radio"/> | <input type="radio"/> | <input type="radio"/> | <input type="radio"/> | <input type="radio"/> | <input type="radio"/> |
| Teaching/education duties            | <input type="radio"/> | <input type="radio"/> | <input type="radio"/> | <input type="radio"/> | <input type="radio"/> | <input type="radio"/> | <input type="radio"/> | <input type="radio"/> | <input type="radio"/> | <input type="radio"/> | <input type="radio"/> | <input type="radio"/> |
| Didactic classes                     | <input type="radio"/> | <input type="radio"/> | <input type="radio"/> | <input type="radio"/> | <input type="radio"/> | <input type="radio"/> | <input type="radio"/> | <input type="radio"/> | <input type="radio"/> | <input type="radio"/> | <input type="radio"/> | <input type="radio"/> |

# Movement disorders fellowship program survey

**13. If you have a second year fellow, how many half-days each week does the second year fellow work in the following areas? If not, please skip question.**

|                                      | 0                     | <1                    | 1                     | 2                     | 3                     | 4                     | 5                     | 6                     | 7                     | 8                     | 9                     | 10                    |
|--------------------------------------|-----------------------|-----------------------|-----------------------|-----------------------|-----------------------|-----------------------|-----------------------|-----------------------|-----------------------|-----------------------|-----------------------|-----------------------|
| Outpatient movement disorders clinic | <input type="radio"/> | <input type="radio"/> | <input type="radio"/> | <input type="radio"/> | <input type="radio"/> | <input type="radio"/> | <input type="radio"/> | <input type="radio"/> | <input type="radio"/> | <input type="radio"/> | <input type="radio"/> | <input type="radio"/> |
| Inpatient consults                   | <input type="radio"/> | <input type="radio"/> | <input type="radio"/> | <input type="radio"/> | <input type="radio"/> | <input type="radio"/> | <input type="radio"/> | <input type="radio"/> | <input type="radio"/> | <input type="radio"/> | <input type="radio"/> | <input type="radio"/> |
| Clinical research                    | <input type="radio"/> | <input type="radio"/> | <input type="radio"/> | <input type="radio"/> | <input type="radio"/> | <input type="radio"/> | <input type="radio"/> | <input type="radio"/> | <input type="radio"/> | <input type="radio"/> | <input type="radio"/> | <input type="radio"/> |
| Basic research                       | <input type="radio"/> | <input type="radio"/> | <input type="radio"/> | <input type="radio"/> | <input type="radio"/> | <input type="radio"/> | <input type="radio"/> | <input type="radio"/> | <input type="radio"/> | <input type="radio"/> | <input type="radio"/> | <input type="radio"/> |
| Teaching/education duties            | <input type="radio"/> | <input type="radio"/> | <input type="radio"/> | <input type="radio"/> | <input type="radio"/> | <input type="radio"/> | <input type="radio"/> | <input type="radio"/> | <input type="radio"/> | <input type="radio"/> | <input type="radio"/> | <input type="radio"/> |
| Didactic classes                     | <input type="radio"/> | <input type="radio"/> | <input type="radio"/> | <input type="radio"/> | <input type="radio"/> | <input type="radio"/> | <input type="radio"/> | <input type="radio"/> | <input type="radio"/> | <input type="radio"/> | <input type="radio"/> | <input type="radio"/> |

**14. Of the patients seen by your fellow(s), approximately what percentage have the following conditions? Enter percentages (must add up to 100%).**

|                                                                             |                      |
|-----------------------------------------------------------------------------|----------------------|
| Parkinson's disease                                                         | <input type="text"/> |
| Dystonia                                                                    | <input type="text"/> |
| Tremor disorders                                                            | <input type="text"/> |
| Ataxia/gait disorders                                                       | <input type="text"/> |
| Other movement disorders<br>(i.e. chorea, tics, tardive syndromes, various) | <input type="text"/> |
| General neurology (non-movement disorders)                                  | <input type="text"/> |

## Movement disorders fellowship program survey

**\*15. Does your fellowship have dedicated 1/2 or full day clinics for the following specialties? Check all that apply.**

- Botulinum toxin injections
- DBS programming
- DBS intra-operative experience
- Parkinson's disease
- Atypical parkinsonism
- Dystonia
- Huntington's disease
- Tremor
- Ataxia
- Tourette and tics
- Many of above, but interspersed through general movement disorders clinics
- Other (please specify)

**\*16. Does your program make efforts to standardize the educational content for each fellow? If so, how? Check all that apply.**

- Written list of required text and journal article readings
- Standard schedule of lectures covering specific topics aimed towards the fellow(s)
- Formal written examinations
- Formal oral examinations
- Formal clinical performance examination
- No, we do not have a formally prescribed curriculum
- Other (please specify)

## Movement disorders fellowship program survey

**\*17. Does your fellowship have a regular patient oriented teaching conference (at least monthly)?**

- DBS conference
- Video conference
- Live patient conference
- Journal club
- Other (please specify)

**\*18. Does your fellowship have a regularly occurring didactic lecture based series directed at teaching the basics of movement disorders?**

- Yes
- No



# Movement disorders fellowship program survey

## Faculty supervision and accreditation

### 19. How many movement disorders neurologists are on your fellowship faculty?

Number

### 20. How many faculty directly supervise your fellow's clinical work in outpatient clinic?

Number

### \*21. Is your fellowship accredited by your hospital or clinic's local graduate medical education office (GME)?

- Yes
- No
- I don't know
- N/A

### \*22. Is the fellow's salary the same, more or less than your hospital's PGY5 or 6 ACGME salaries?

- Same
- More
- Less
- I don't know
- N/A, no standard ACGME salaries

## Movement disorders fellowship program survey

**\*23. What sources of funding are used to support the fellow's salary? Check all that apply.**

- Industry Grant
- Philanthropy Other Than a PD Foundation
- Revenue from running clinical trials
- Clinical revenue from fellow's movement disorders clinic activities
- Clinical revenue from fellow's general neurology clinic or attending time
- Salaries of movement disorders faculty
- Institution support
- Private donor support
- APDA fellowship
- PDF fellowship
- AAN Clinical Research Training Fellowship
- NIH T32 training grant
- APDA Center of Excellence core grant
- NPF Grants including Center of Excellence
- Other (please specify)

# Movement disorders fellowship program survey

## Fellow's role

**\*24. If you no longer offered a fellowship, in which of the following ways do you think the movement disorders fellow would be missed? Check all that apply.**

- Provides patient care and access to specialist MD care that is otherwise scarce
- Provides essential assistance with clinical research projects
- Helps educate medical residents and students about movement disorders
- Contributes to scholarly activities (i.e. video conference, journal club)
- Provides complex care that is difficult without fellows, nurses, or PAs
- Fulfills future need for well-trained movement disorders clinician in the community at large
- Other (please specify)

**\*25. What positions have your fellows accepted after completion of the fellowship? Enter percentages (must add up to 100%)**

|                                         |                      |
|-----------------------------------------|----------------------|
| Within US/Canada, private practice      | <input type="text"/> |
| Within US/Canada, academic position     | <input type="text"/> |
| Within US/Canada, industry              | <input type="text"/> |
| Outside of US/Canada, private practice  | <input type="text"/> |
| Outside of US/Canada, academic position | <input type="text"/> |
| Outside of US/Canada, industry          | <input type="text"/> |
| Another fellowship                      | <input type="text"/> |
| Other                                   | <input type="text"/> |

**\*26. How likely is your institution to offer a fellowship next year (AY 2012-13)?**

- Unlikely (5% or less)
- Somewhat unlikely (25% or less)
- 50% likely
- Very likely (about 75%)
- Most likely (95% or higher likelihood)

# Movement disorders fellowship program survey

## Projected fellowship slots

**\*27. For AY 2012-13, how many fellowship slots will you offer? Do not count fellows continuing from a prior year.**

Number of slots

# Movement disorders fellowship program survey

## Assessing need for movement disorders specialists

**\*28. Do you think there currently is an adequate number of movement disorders fellowship trained specialists?**

- No, a critical shortage
- No, a shortage, but not critical
- Yes, adequate
- Yes, in excess
- I don't know

**\*29. Do you think IN THE FUTURE there will be an adequate number of movement disorders fellowship trained specialists?**

- No, a critical shortage
- No, a shortage, but not critical
- Yes, adequate
- Yes, in excess
- I don't know

**\*30. In considering obstacles to establishing/continuing movement disorders fellowships, rate the following possibilities:**

|                                                                            | Very important        | Somewhat important    | Neutral               | Somewhat unimportant  | Very unimportant      |
|----------------------------------------------------------------------------|-----------------------|-----------------------|-----------------------|-----------------------|-----------------------|
| Lack of funding                                                            | <input type="radio"/> | <input type="radio"/> | <input type="radio"/> | <input type="radio"/> | <input type="radio"/> |
| Lack of faculty/centers interested in offering training                    | <input type="radio"/> | <input type="radio"/> | <input type="radio"/> | <input type="radio"/> | <input type="radio"/> |
| Lack of interest from neurology residency graduates                        | <input type="radio"/> | <input type="radio"/> | <input type="radio"/> | <input type="radio"/> | <input type="radio"/> |
| Lack of official board certifying this subspecialty                        | <input type="radio"/> | <input type="radio"/> | <input type="radio"/> | <input type="radio"/> | <input type="radio"/> |
| Lack of enough movement disorders patients in my area to justify a program | <input type="radio"/> | <input type="radio"/> | <input type="radio"/> | <input type="radio"/> | <input type="radio"/> |

Other (please specify)

## end survey

Thank you for completing the survey.

### 31. Comments:
